# Supplementary material
Source: MDPI journal article supplement (https://www.mdpi.com/2073-4433/11/3/249)

SOUTH DAKOTA ODOR FOOTPRINT TOOL

- Procedure to use SDOFT:
- 1 Select South Dakota County from drop down list where site is located.
  - 2 Select Odor Source Type from drop down list for each odor source at the site.
  - 3 Select housing or manure storage type from drop down list for each odor source at the site.
  - 4 Enter size (width and length) of emitting surface for each odor source at the site.
  - 5 Enter odor control technology if any from drop down list for each odor source at the site.
  - 6 View annoyance-free distances at bottom of page (scroll down).
  - 7 Select the annoyance-free curves to be graphed by checking the square on the left bottom of this page.

County of Site  Hidden to provide cooperator anonymity

|             |            |            |                |            |            |
|-------------|------------|------------|----------------|------------|------------|
|             | Source 1   | Source 2   | Source 3       | Source 4   | Source 5   |
| Source Type | Swine Barn | Swine Barn | Manure Storage | Dairy Barn | Dairy Barn |

|                                |                      |                      |                       |            |            |
|--------------------------------|----------------------|----------------------|-----------------------|------------|------------|
|                                |                      |                      |                       |            |            |
| Housing Type or Manure Storage | Finishing - Deep Pit | Finishing - Deep Pit | Earthen Storage Basin | Free Stall | Free Stall |

|                 |     |     |    |    |    |
|-----------------|-----|-----|----|----|----|
| Emitting Factor | 165 | 165 | 63 | 29 | 29 |
|-----------------|-----|-----|----|----|----|

|                  |     |     |  |  |  |
|------------------|-----|-----|--|--|--|
| Emitting Surface |     |     |  |  |  |
| Width (ft)       | 39  | 39  |  |  |  |
| Length (ft)      | 200 | 200 |  |  |  |

|                       |      |      |   |   |   |
|-----------------------|------|------|---|---|---|
| Emitting Area (sq ft) | 7800 | 7800 | 0 | 0 | 0 |
|-----------------------|------|------|---|---|---|

|                     |                   |                   |                   |                   |                   |
|---------------------|-------------------|-------------------|-------------------|-------------------|-------------------|
|                     | A No Odor Control |
| Odor Control Factor | 1                 | 1                 | 1                 | 1                 | 1                 |

|                        |     |     |   |   |   |
|------------------------|-----|-----|---|---|---|
| Source Emitting Factor | 129 | 129 | 0 | 0 | 0 |
|------------------------|-----|-----|---|---|---|

Total Odor Emitting Factor (TOEF) 257

SETBACK DISTANCES FROM ODOR SOURCE AT VARIOUS ODOR ANNOYANCE-FREE FREQUENCIES IN FEET

|                       |                    |                    |                    |                    |                    |                    |
|-----------------------|--------------------|--------------------|--------------------|--------------------|--------------------|--------------------|
| Direction from source | 99% Annoyance-free | 98% Annoyance-free | 97% Annoyance-free | 96% Annoyance-free | 94% Annoyance-free | 91% Annoyance-free |
| North                 | 6821               | 3748               | 2773               | 2239               | 1651               | 1218               |
| East                  | 4425               | 2302               | 1618               | 1444               | 1025               | 530                |
| South                 | 4740               | 2402               | 1793               | 1507               | 1122               | 645                |
| West                  | 4608               | 2234               | 1735               | 1332               | 1073               | 529                |

Select which annoyance-free curves to show on graph

- ☒ 99% Annoyance-free
- ☒ 98% Annoyance-free
- ☒ 97% Annoyance-free
- ☒ 96% Annoyance-free
- ☒ 94% Annoyance-free
- ☒ 91% Annoyance-free

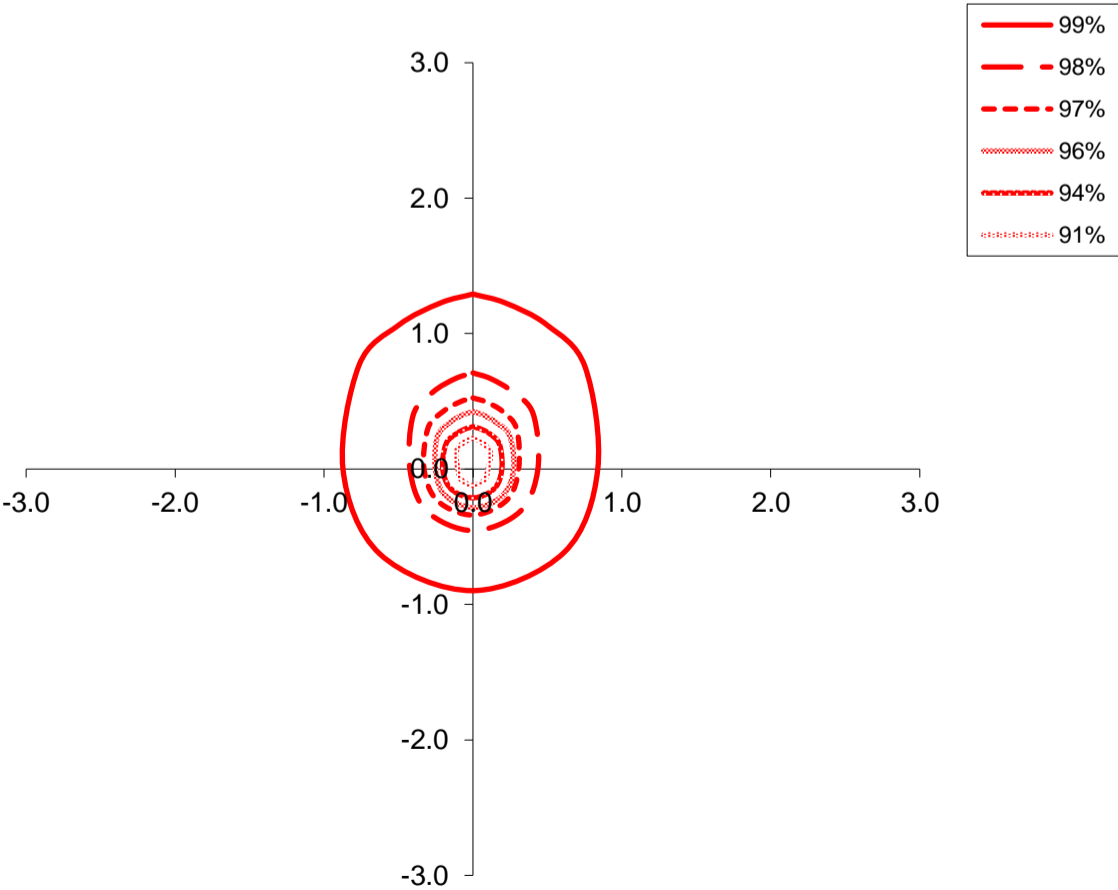

Supplement: s1 [file s1 › S3. South Dakota Odor Footprint Tool Report for Swine Case Study.pdf]
