# Supplementary material
Source: MDPI journal article supplement (https://www.mdpi.com/2073-4433/11/3/249)
Supplement: s1 [file s1]

Archive with 3 entries (3 files):
- S1. South Dakota Odor Footprint Tool with Example Data Entries.xlsx
- S2. South Dakota Odor Footprint Tool Report for Dairy Case Study.pdf
- S3. South Dakota Odor Footprint Tool Report for Swine Case Study.pdf
