# Supplementary material
Source: MDPI journal article supplement (https://www.mdpi.com/2073-4433/11/3/249)
Supplement: s1 [file s1 › S1. South Dakota Odor Footprint Tool with Example Data Entries.xlsx]

## Sheet: Emission
						Version 4.1
SOUTH DAKOTA ODOR FOOTPRINT TOOL
Procedure to use SDOFT:								Source Type		CattleYard	DairyBarn	SwineBarn	PoultryBarn	ManureStorage
1	Select South Dakota County from drop down list where site is located.
2	Select Odor Source Type from drop down list for each odor source at the site.
3	Select housing or manure storage type from drop down list for each odor source at the site.
4	Enter size (width and length) of emitting surface for each odor source at the site.
5	Enter odor control technology if any from drop down list for each odor source at the site.
6	View annoyance-free distances at bottom of page (scroll down).
7	Select the annoyance-free curves to be graphed by checking the square on the left bottom of this page.
County of Site	Brookings							Cattle Yard		Dirt/Concrete lot	Free Stall	Gestation - Deep Pit	Broiler Litter	Earthen Storage Basin
								Dairy Barn		Free Stall - Scrape	Loose Housing	Gestation - Pull Plug	Turkey Litter	Steel or Concrete Tank
	Source 1	Source 2	Source 3	Source 4	Source 5			Swine Barn			Tie Stall	Farrowing		Crusted Stockpile
Source Type	Dairy Barn	Dairy Barn	Manure Storage	Dairy Barn	Dairy Barn			Manure Storage				Finishing - Deep Pit
												Finishing - Hoop Barn
									Factor			Finishing - Pull Plug
Housing Type or Manure Storage	Free Stall	Free Stall	Earthen Storage Basin	Free Stall	Free Stall				0
								Anaerobic Lagoon - Non Purple	3		Aurora	2
Emitting Factor	29	29	63	29	29			Anaerobic Lagoon - Purple	2		Beadle	3
								Broiler Litter	5		Bennett	3
Emitting Surface								Crusted Stockpile	9		Bon Homme	2
Width (ft)	330	114	380					Dirt/Concrete lot	19		Brookings	1
Length (ft)	1572	320	950					Earthen Storage Basin	63		Brown	1
	.							Farrowing	68		Brule	2
Emitting Area (sq ft)	518760	36480	361000	0	0			Finishing - Deep Pit	165		Buffalo	3
								Finishing - Hoop Barn	19		Butte	3
Odor Control Technology	A No Odor Control	A No Odor Control	A No Odor Control	A No Odor Control	A No Odor Control			Finishing - Open Front Scrape	53		Campbell	3
Odor Control Factor	1	1	1	1	1			Finishing - Pull Plug	97		Charles Mix	2
								Free Stall	29		Clark	1
Source Emitting Factor	1504.4	105.792	2274.3	0	0			Free Stall - Scrape	19		Clay	2
								Gestation - Deep Pit	243		Codington	1
				Total Odor Emitting Factor (TOEF)	3884.5			Gestation - Pull Plug	146		Corson	3
								Loose Housing	29		Custer
SETBACK DISTANCES FROM ODOR SOURCE AT VARIOUS ODOR ANNOYANCE-FREE FREQUENCIES IN FEET								Steel or Concrete Tank	136		Davison	2
								Turkey Litter	10		Day	1
Direction from source	99% Annoyance-free	98% Annoyance-free	97% Annoyance-free	96% Annoyance-free	94% Annoyance-free	91% Annoyance-free					Deuel	1
North	30985.3	17953.8	11482.4	8231.49	5470.33	3595.82					Dewey	3
East	17823	8375.74	5923.31	4157.02	2356.99	816.798		Odor Control Technology	Factor		Douglas	2
South	19849.1	9162.45	6612.21	5212.42	3086.4	1093.38		A No Odor Control	1		Edmunds	1
West	17046.7	8936.08	6495.08	4805.78	2889.26	891.889		Biofilter	0.1		Fall River
								Geotextile Cover	0.5		Faulk	1
								Impermeable Cover	0.1		Grant	1
								Oil Sprinkling	0.5		Gregory	2
								Straw Cover 2 in	0.5		Haakon	3
								Straw Cover 4 in	0.4		Hamlin	1
								Straw Cover 6 in	0.3		Hand	3
								Straw Cover 8 in	0.2		Hanson	2
											Harding	3
											Hughes	3
											Hutchinson	2
											Hyde	3
											Jackson	3
											Jerauld	3
											Jones	3
											Kingsbury	1
											Lake	1
											Lawrence
											Lincoln	2
											Lyman	2
											Marshall	1
											McCook	2
											McPherson	1
											Meade	3
											Mellette	3
											Miner	1
											Minnehaha	2
											Moody	1
											Pennington	3
											Perkins	3
											Potter	3
											Roberts	1
											Sanborn	3
											Shannon	3
											Spink	1
											Stanley	3
											Sully	3
											Todd	3
											Tripp	2
											Turner	2
											Union	2
											Walworth	3
								Tree Windbreak 2 Row	0.7		Yankton	2
								Tree Windbreak 5 Row	0.3		Ziebach	3

## Sheet: Dispersion
Species	Cattle
Housing
										Setback Tables for various Total Odor Emitting Factor at various annoyance-free frequencies.
										Area 1
										N	1	A	B	C	D	E	F
										N	0	0	0	0	0	0	0
TOEF	3884.5									N	50	0.33108	0.15438	0.1054	0.08618	0.0775	0.062
										N	100	0.774566	0.416268	0.31465	0.2604	0.195734	0.147374
Area	1	Current area in SD								N	200	1.12902	0.624216	0.455142	0.370512	0.277698	0.205282
										N	300	1.41273	0.773388	0.577034	0.46376	0.33852	0.249674
										N	400	1.66247	0.925102	0.666562	0.529666	0.38781	0.288424
										N	500	1.86403	1.0615	0.760492	0.591108	0.430218	0.307892
preceding #	8									N	1000	2.64635	1.60983	1.10397	0.830118	0.595572	0.419244
	1									N	2000	4.01518	2.25271	1.5854	1.15376	0.762104	0.545166
Next #	8									N	3000	4.98821	2.87017	1.922	1.39618	0.940354	0.6014
	2									N	4000	5.98337	3.46958	2.2077	1.58026	1.04854	0.691424
										E	0	0	0	0	0	0	0
Values just preceding and after the TOEF from setback table										E	50	0.18414	0.12648	0.10478	0.09176	0.07812	0.06634
		99	98	97	96	94	91			E	100	0.510446	0.248	0.2046	0.174096	0.128712	0.071424
	1	A	B	C	D	E	F			E	200	0.737676	0.3782	0.274784	0.245768	0.180234	0.101184
North	3000	4.98821	2.87017	1.922	1.39618	0.940354	0.6014			E	300	0.912578	0.478888	0.329778	0.294004	0.20429	0.099882
	4000	5.98337	3.46958	2.2077	1.58026	1.04854	0.691424			E	400	1.04179	0.5425	0.40052	0.317564	0.215574	0.1054
East	3000	2.95002	1.4371	1.03267	0.753424	0.4464	0.150474			E	500	1.20565	0.624712	0.4464	0.372744	0.25203	0.11687
	4000	3.43114	1.6058	1.13348	0.79174	0.4464	0.155248			E	1000	1.6957	0.831358	0.63054	0.517576	0.352346	0.123256
South	3000	3.348	1.59284	1.08643	0.884926	0.54901	0.20708			E	2000	2.41329	1.147	0.868	0.70649	0.443734	0.123566
	4000	3.813	1.75392	1.27398	1.00056	0.589186	0.20708			E	3000	2.95002	1.4371	1.03267	0.753424	0.4464	0.150474
West	3000	2.976	1.488	1.04582	0.886166	0.536734	0.163928			E	4000	3.43114	1.6058	1.13348	0.79174	0.4464	0.155248
	4000	3.26151	1.71914	1.2542	0.913322	0.548576	0.16957			S	0	0	0	0	0	0	0
										S	50	0.279	0.15376	0.11842	0.10044	0.07936	0.06014
Setback distances for various annoyance-free frequencies										S	100	0.544918	0.286254	0.213714	0.181784	0.143034	0.091574
		99	98	97	96	94	91			S	200	0.78988	0.404612	0.301692	0.253084	0.190216	0.113708
North		5.86843	3.40035	2.1747	1.55899	1.03605	0.681026			S	300	0.977926	0.49228	0.367784	0.309442	0.22909	0.128402
East		3.37557	1.58631	1.12184	0.787314	0.4464	0.154697			S	400	1.13119	0.579514	0.41509	0.353958	0.26102	0.146816
South		3.75929	1.73531	1.25231	0.9872	0.584546	0.20708			S	500	1.30064	0.65441	0.471882	0.395684	0.274226	0.153202
West		3.22853	1.69244	1.23013	0.910185	0.547208	0.168918			S	1000	1.86521	0.881206	0.65751	0.539896	0.374604	0.206832
										S	2000	2.75888	1.26492	0.895404	0.735816	0.457126	0.20708
										S	3000	3.348	1.59284	1.08643	0.884926	0.54901	0.20708
										S	4000	3.813	1.75392	1.27398	1.00056	0.589186	0.20708
North	0	5.86843	3.40035	2.1747	1.55899	1.03605	0.681026			W	0	0	0	0	0	0	0
East	90	3.37557	1.58631	1.12184	0.787314	0.4464	0.154697			W	50	0.25978	0.14632	0.11532	0.09982	0.07998	0.06014
South	180	-3.75929	-1.73531	-1.25231	-0.9872	-0.584546	-0.20708			W	100	0.53909	0.256928	0.189844	0.174778	0.124186	0.07006
West	270	-3.22853	-1.69244	-1.23013	-0.910185	-0.547208	-0.168918			W	200	0.776364	0.385454	0.304792	0.241304	0.181722	0.084754
										W	300	0.944198	0.451174	0.346332	0.2604	0.219232	0.1116
										W	400	1.0912	0.5208	0.4092	0.3162	0.232128	0.116932
										W	500	1.22568	0.606174	0.459234	0.347448	0.25699	0.124
										W	1000	1.66123	0.915182	0.66309	0.53134	0.374728	0.124
										W	2000	2.39698	1.2462	0.894102	0.744	0.465	0.134912
										W	3000	2.976	1.488	1.04582	0.886166	0.536734	0.163928
										W	4000	3.26151	1.71914	1.2542	0.913322	0.548576	0.16957
										Area 2
										NE	OU/s	99	98	97	96	94	91
										NE	0	0	0	0	0	0	0
										NE	50	0.33108	0.15438	0.1054	0.08618	0.0775	0.062
										NE	100	0.49352	0.21638	0.15066	0.12586	0.10602	0.08742
										NE	200	0.70928	0.3038	0.21204	0.18662	0.1581	0.12958
										NE	300	0.8742	0.37386	0.2573	0.22816	0.1984	0.1612
										NE	400	0.9982	0.43028	0.3038	0.27032	0.2263	0.17794
										NE	500	1.14576	0.47306	0.34782	0.31124	0.25978	0.20522
										NE	1000	1.59836	0.64604	0.47802	0.4061	0.32116	0.2139
										NE	2000	2.33678	0.89218	0.7099	0.62248	0.4929	0.31744
										NE	3000	2.9109	1.10484	0.91698	0.7998	0.63798	0.43772
										NE	4000	3.26926	1.2865	1.06454	0.92318	0.72664	0.47244
										SE	0	0	0	0	0	0	0
										SE	50	0.25978	0.14632	0.11532	0.09982	0.07998	0.06014
										SE	100	0.37262	0.2108	0.16182	0.13702	0.1085	0.07626
										SE	200	0.54064	0.30008	0.23312	0.19902	0.155	0.10788
										SE	300	0.66836	0.36456	0.28582	0.24056	0.18476	0.12152
										SE	400	0.79484	0.42656	0.32922	0.279	0.21266	0.13888
										SE	500	0.868	0.48918	0.37014	0.31248	0.23932	0.15438
										SE	1000	1.28712	0.6913	0.51212	0.42284	0.28644	0.1581
										SE	2000	1.8848	0.9579	0.72478	0.59272	0.40238	0.19964
										SE	3000	2.3529	1.20838	0.89156	0.73718	0.50034	0.25916
										SE	4000	2.7559	1.4136	1.02362	0.83328	0.5456	0.27404
										SW	0	0	0	0	0	0	0
										SW	50	0.279	0.15376	0.11842	0.10044	0.07936	0.06014
										SW	100	0.40796	0.21824	0.16802	0.14198	0.11222	0.08308
										SW	200	0.60822	0.31744	0.24056	0.2015	0.15748	0.11098
										SW	300	0.74648	0.38936	0.2945	0.24676	0.19096	0.13144
										SW	400	0.87978	0.45632	0.34286	0.28458	0.21886	0.14508
										SW	500	0.9796	0.5115	0.37882	0.31372	0.24242	0.15128
										SW	1000	1.43344	0.72726	0.54064	0.44764	0.33108	0.20522
										SW	2000	2.09312	1.0447	0.7533	0.61628	0.4371	0.21948
										SW	3000	2.6102	1.27162	0.9083	0.72912	0.48608	0.18662
										SW	4000	3.02188	1.46754	1.05152	0.83638	0.55242	0.21824
										NW	0	0	0	0	0	0	0
										NW	50	0.18414	0.12648	0.10478	0.09176	0.07812	0.06634
										NW	100	0.27342	0.18476	0.1519	0.13268	0.1147	0.09672
										NW	200	0.40486	0.26722	0.21948	0.1922	0.16492	0.13702
										NW	300	0.5053	0.33232	0.26908	0.2387	0.20584	0.16988
										NW	400	0.58032	0.38812	0.31372	0.279	0.2387	0.19468
										NW	500	0.66898	0.44082	0.35402	0.31682	0.26598	0.21514
										NW	1000	1.01246	0.63426	0.51336	0.45942	0.38626	0.30566
										NW	2000	1.49544	0.91636	0.74958	0.66154	0.5456	0.42222
										NW	3000	1.86806	1.14638	0.93248	0.81716	0.66154	0.48422
										NW	4000	2.21836	1.31936	1.09244	0.96038	0.7719	0.5611
											Area 3
										NE	OU/s	99	98	97	96	94	91
										NE	0	0	0	0	0	0	0
										NE	50	0.17794	0.11408	0.11532	0.07502	0.05084	0.0372
										NE	100	0.2635	0.16244	0.1271	0.1023	0.06758	0.04712
										NE	200	0.3875	0.23312	0.17794	0.14136	0.08742	0.062
										NE	300	0.47244	0.28396	0.21576	0.16616	0.10602	0.05332
										NE	400	0.55676	0.32922	0.24614	0.1953	0.11036	0.0744
										NE	500	0.6231	0.3627	0.27652	0.2077	0.1395	0.07688
										NE	1000	0.91574	0.51832	0.37014	0.26846	0.1736	0.07068
										NE	2000	1.3516	0.71858	0.49538	0.3751	0.2325	0.09672
										NE	3000	1.6709	0.868	0.59954	0.41044	0.217	0.12772
										NE	4000	1.9654	0.98084	0.66216	0.44516	0.21576	0.1209
										SE	0	0	0	0	0	0	0
										SE	50	0.17112	0.12028	0.10044	0.08928	0.07564	0.06138
										SE	100	0.24862	0.17298	0.1457	0.12958	0.1085	0.08556
										SE	200	0.36828	0.2511	0.2108	0.18662	0.155	0.11904
										SE	300	0.46748	0.31744	0.26164	0.2294	0.1891	0.1426
										SE	400	0.54994	0.36766	0.3038	0.26784	0.21762	0.16182
										SE	500	0.62558	0.41726	0.34224	0.30008	0.2418	0.17732
										SE	1000	0.93372	0.60326	0.49228	0.42346	0.33294	0.23808
										SE	2000	1.3826	0.87358	0.70432	0.60574	0.46996	0.3038
										SE	3000	1.7732	1.08004	0.86304	0.73222	0.55242	0.36828
										SE	4000	2.08382	1.25054	1.00874	0.85684	0.64418	0.3968
										SW	0	0	0	0	0	0	0
										SW	50	0.20646	0.1271	0.10168	0.08928	0.07254	0.05394
										SW	100	0.29884	0.18228	0.1457	0.1271	0.10044	0.07254
										SW	200	0.43896	0.26226	0.20894	0.17732	0.13578	0.09424
										SW	300	0.53692	0.32302	0.25916	0.22754	0.1736	0.11656
										SW	400	0.6169	0.37572	0.29636	0.248	0.17732	0.11346
										SW	500	0.7037	0.4247	0.3317	0.27466	0.20088	0.12586
										SW	1000	1.01928	0.61628	0.48732	0.4123	0.2976	0.1798
										SW	2000	1.49482	0.8835	0.68386	0.55242	0.36766	0.19654
										SW	3000	1.85628	1.09616	0.79732	0.62868	0.4588	0.24862
										SW	4000	2.16318	1.27286	0.95976	0.75392	0.48422	0.26226
										NW	0	0	0	0	0	0	0
										NW	50	0.21018	0.14694	0.12152	0.10788	0.09114	0.07688
										NW	100	0.31496	0.217	0.17794	0.15748	0.13144	0.11036
										NW	200	0.47926	0.31682	0.26102	0.2294	0.19406	0.15872
										NW	300	0.60264	0.39742	0.32612	0.2852	0.24056	0.19592
										NW	400	0.72292	0.47492	0.38378	0.3379	0.27776	0.22258
										NW	500	0.81778	0.53382	0.434	0.3751	0.31372	0.2542
										NW	1000	1.23752	0.80042	0.64356	0.55862	0.45198	0.35774
										NW	2000	1.87798	1.19474	0.94984	0.8184	0.64976	0.50096
										NW	3000	2.38762	1.4973	1.1904	1.01742	0.79484	0.61442
										NW	4000	2.84704	1.76266	1.39562	1.1842	0.93496	0.70308

## Sheet: Graphing
360	5.86843	3.40035	2.1747	1.55899	1.03605	0.681026		North
350	5.57804	3.21248	2.07079	1.48763	0.982275	0.624694
335	5.12926	2.92213	1.91022	1.37733	0.899173	0.537636
315	4.622	2.49333	1.64827	1.17315	0.741224	0.417861		Northwest
270	3.37557	1.58631	1.12184	0.787314	0.4464	0.154697		West
225	3.56743	1.66081	1.18708	0.887257	0.515473	0.180888		Southwest
180	3.75929	1.73531	1.25231	0.9872	0.584546	0.20708		South
135	3.49391	1.71388	1.24122	0.948693	0.565877	0.187999		Southeast
90	3.22853	1.69244	1.23013	0.910185	0.547208	0.168918		East
45	4.54848	2.54639	1.70241	1.23459	0.791628	0.424972		Northeast
25	5.12926	2.92213	1.91022	1.37733	0.899173	0.537636
10	5.57804	3.21248	2.07079	1.48763	0.982275	0.624694
0	5.86843	3.40035	2.1747	1.55899	1.03605	0.681026		North
	0.99		0.98		0.97		0.96		0.94		0.91
	TRUE		TRUE		TRUE		TRUE		TRUE		TRUE
X	Y	X	Y	X	Y	X	Y	X	Y	X	Y
1.79742e-15	5.86843	1.04148e-15	3.40035	6.66082e-16	2.1747	4.775e-16	1.55899	3.17328e-16	1.03605	2.08589e-16	0.681026
0.968616	5.4933	0.557841	3.16367	0.35959	2.03933	0.258323	1.46502	0.17057	0.967352	0.108477	0.615204
2.16772	4.64869	1.23495	2.64835	0.807293	1.73125	0.582084	1.24828	0.380007	0.814927	0.227215	0.487263
3.26825	3.26825	1.76305	1.76305	1.1655	1.1655	0.829545	0.829545	0.524124	0.524124	0.295473	0.295473
3.37557	-8.27115e-16	1.58631	-3.88694e-16	1.12184	-2.74884e-16	0.787314	-1.92915e-16	0.4464	-1.09381e-16	0.154697	-3.79053e-17
2.52255	-2.52255	1.17437	-1.17437	0.83939	-0.83939	0.627386	-0.627386	0.364494	-0.364494	0.127907	-0.127907
-6.90853e-16	-3.75929	-3.18902e-16	-1.73531	-2.3014e-16	-1.25231	-1.8142e-16	-0.9872	-1.07423e-16	-0.584546	-3.80556e-17	-0.20708
-2.47057	-2.47057	-1.21189	-1.21189	-0.877676	-0.877676	-0.670827	-0.670827	-0.400135	-0.400135	-0.132935	-0.132935
-3.22853	3.95543e-16	-1.69244	2.07349e-16	-1.23013	1.50709e-16	-0.910185	1.11511e-16	-0.547208	6.70411e-17	-0.168918	2.0695e-17
-3.21626	3.21626	-1.80057	1.80057	-1.20379	1.20379	-0.872987	0.872987	-0.559765	0.559765	-0.300501	0.300501
-2.16772	4.64869	-1.23495	2.64835	-0.807293	1.73125	-0.582084	1.24828	-0.380007	0.814927	-0.227215	0.487263
-0.968616	5.4933	-0.557841	3.16367	-0.35959	2.03933	-0.258323	1.46502	-0.17057	0.967352	-0.108477	0.615204
3.59485e-16	5.86843	2.08296e-16	3.40035	1.33216e-16	2.1747	9.55e-17	1.55899	6.34656e-17	1.03605	4.17179e-17	0.681026

## Sheet: SDOFT vs OFFSET
			Footprint	OFFSET	Ratio	NEOFT
Swine	Gestation	Deep pit, natural or mechanical	243	50	4.86
		Pull plug, natural or mechanical	146	30	4.86667
	Farrowing	Pull plug, natural or mechanical	68	14	4.85714
	Nursery	Deep pit or pull plug, natural or mechanical	204	42	4.85714
		Deep pit, natural or mechanical	165	34	4.85294
		Pull plug, natural or mechanical	97	20	4.85
	Finishing	Hoop barn, deep bedded, scrape Cargil / open front, scrape	19	4	4.75
		Loose housing, scrape Open concrete lot, scrape	53	11	4.81818
Cattle	Beef	Dirt/concrete lot; Free stall, scrape	19.4	4	4.85
	Dairy	Free stall, deep pit;Loose housing, scrape	29.1	6	4.85
		Tie Stall	9.7	2	4.85
Poultry	Broiler	Litter	4.85	1	4.85
	Turkey	Litter	9.7	2	4.85
Manure storage facility	Earthen basin		63	13	4.84615	65
	Steel or concrete tank, above or below ground		136	28	4.85714	135
	Crusted stockpile		9	2	4.5
Treatment facility	Anaerobic lagoon	Purple (phototrohic)	2
		Non-photrophic (non-purple)	3
				5
