# Supplementary material
Source: MDPI journal article supplement (https://www.mdpi.com/2073-4433/11/3/249)

SOUTH DAKOTA ODOR FOOTPRINT TOOL

- Procedure to use SDOFT:
- 1 Select South Dakota County from drop down list where site is located.
  - 2 Select Odor Source Type from drop down list for each odor source at the site.
  - 3 Select housing or manure storage type from drop down list for each odor source at the site.
  - 4 Enter size (width and length) of emitting surface for each odor source at the site.
  - 5 Enter odor control technology if any from drop down list for each odor source at the site.
  - 6 View annoyance-free distances at bottom of page (scroll down).
  - 7 Select the annoyance-free curves to be graphed by checking the square on the left bottom of this page.

County of Site

Hidden to provide cooperator anonymity

Source 1Source 2Source 3Source 4Source 5

Dairy BarnDairy BarnManure StorageDairy BarnDairy Barn

Housing Type or Manure Storage

Free StallFree StallEarthen Storage BasinFree StallFree Stall

Emitting Factor

2929632929

Emitting Surface

Width (ft)

330114380

Length (ft)

1572320950

Emitting Area (sq ft)

51876036480361000000

Odor Control Technology

A No Odor ControlA No Odor ControlA No Odor ControlA No Odor ControlA No Odor Control

Odor Control Factor

11111

Source Emitting Factor

1504106227400

Total Odor Emitting Factor (TOEF)

3884

SETBACK DISTANCES FROM ODOR SOURCE AT VARIOUS ODOR ANNOYANCE-FREE FREQUENCIES IN FEET

| Direction from source | 99% Annoyance-free | 98% Annoyance-free | 97% Annoyance-free | 96% Annoyance-free | 94% Annoyance-free | 91% Annoyance-free |
|-----------------------|--------------------|--------------------|--------------------|--------------------|--------------------|--------------------|
| Northeast             | 17043              | 6682               | 5531               | 4799               | 3783               | 2473               |
| Southeast             | 14305              | 7339               | 5324               | 4341               | 2853               | 1438               |
| Southwest             | 15704              | 7629               | 5465               | 4351               | 2876               | 1133               |
| Northwest             | 11499              | 6861               | 5671               | 4983               | 4008               | 2916               |

Select which annoyance-free curves to show on graph

- ☒ 99% Annoyance-free
- ☒ 98% Annoyance-free
- ☒ 97% Annoyance-free
- ☒ 96% Annoyance-free
- ☒ 94% Annoyance-free
- ☒ 91% Annoyance-free

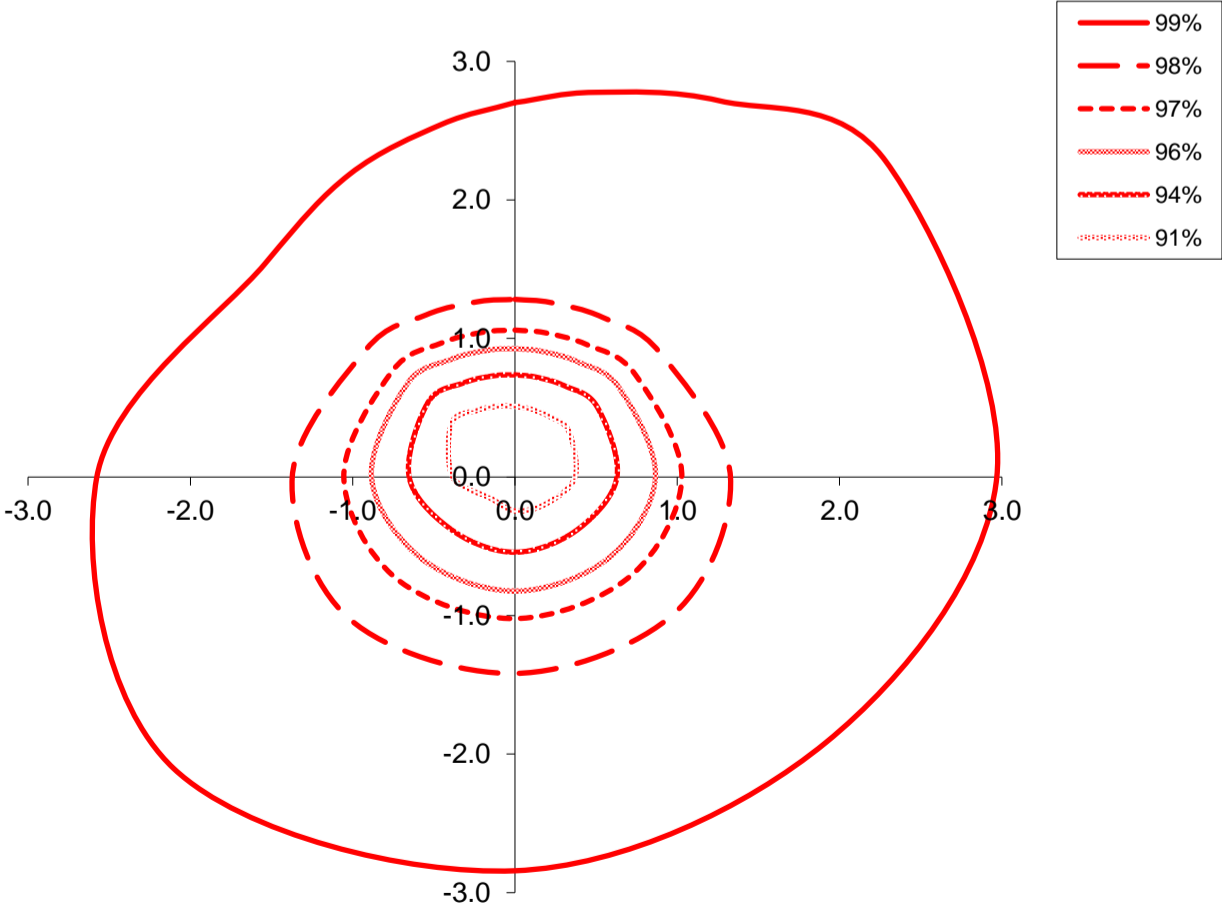

Supplement: s1 [file s1 › S2. South Dakota Odor Footprint Tool Report for Dairy Case Study.pdf]
